# Supplementary material
Source: publisher figshare collection journal article supplement (https://acs.figshare.com/ndownloader/files/23623351)
Supplement: Supplementary file 1 [file 23623351]

Supporting Information

ABEEM/MM OH<sup>-</sup> Models for

OH<sup>-</sup>(H<sub>2</sub>O)<sub>n</sub> Clusters and Aqueous OH<sup>-</sup>:

Structures, Charge Distributions, and Binding

Energies

Hua Shi<sup>†,‡</sup>, Li-Dong Gong<sup>†\*</sup>, Cui Liu<sup>†</sup>, Li-Nan Lu<sup>†</sup>, and Zhong-Zhi Yang<sup>†\*</sup>

<sup>†</sup>School of Chemistry and Chemical Engineering, Liaoning Normal University, Dalian, 116029, People's Republic of China

<sup>‡</sup>School of Marine Science and Environment, Dalian Ocean University, Dalian 116023, People's Republic of China

Corresponding authors E-mail address:

[gongjw@lnnu.edu.cn](mailto:gongjw@lnnu.edu.cn) (Li-Dong Gong)

[zzyang@lnnu.edu.cn](mailto:zzyang@lnnu.edu.cn) (Zhong-Zhi Yang)

Tel: +86 411-82159607

# 1. THE THEORETICAL FORMULAS

## 1.1. The Theoretical Formulas of the ABEEM/MM-I.

$$\chi_{\text{O}(\text{OH}^-)} = \chi_{\text{H}(\text{OH}^-)} = \chi_{\text{O-H}(\text{OH}^-)} = \bar{\chi}_{\text{OH}^-} \quad (\text{S1})$$

$$\chi_{Ii} = \chi_{I(i-j)} = \chi_{I(lp)} = \cdots = \bar{\chi}_I \quad (\text{S2})$$

$$\chi_{Ji} = \chi_{J(i-j)} = \chi_{J(lp)} = \cdots = \bar{\chi}_J \quad (\text{S3})$$

⋮

Eqs. (S1)-(S3) are the electronegativity equalization equations of the ABEEM/MM-I model. Eq. (S1) is the electronegativity equalization equations of the  $\text{OH}^-$ , and the remaining equations are those of the water molecules. Eq. (S1) represents that the electronegativities of O atom, H atom, and O-H bond of  $\text{OH}^-$  are equal to the electronegativity of the  $\text{OH}^-$ . Herein,  $\chi_{\text{O}(\text{OH}^-)}$ ,  $\chi_{\text{H}(\text{OH}^-)}$ , and  $\chi_{\text{O-H}(\text{OH}^-)}$  are the electronegativities of O atom, H atom, and O-H bond of the  $\text{OH}^-$ , and  $\bar{\chi}_{\text{OH}^-}$  is the global electronegativity of the  $\text{OH}^-$ . Eq. (S2) represents that the electronegativities of each atom, each bond, and each lone-pair electron in water molecule  $I$  are equal to the electronegativity of the water molecule  $I$ . Herein,  $\chi_{Ii}$ ,  $\chi_{I(i-j)}$ , and  $\chi_{I(lp)}$  are the electronegativities of atom  $i$ , bond  $i-j$ , and lone-pair electron  $lp$  in water molecule  $I$ , and  $\bar{\chi}_I$  is the global electronegativity of water molecule  $I$ . The remaining equations are the electronegativity equalization equations of other water molecules.

$$q_{\text{O}(\text{OH}^-)} + q_{\text{H}(\text{OH}^-)} + q_{\text{O-H}(\text{OH}^-)} = -1 \quad (\text{S4})$$

$$\sum_i^{N_i} q_{Ii} + \sum_{i-j}^{N_{i-j}} q_{I(i-j)} + \sum_{lp}^{N_{lp}} q_{I(lp)} = 0 \quad (\text{S5})$$

$$\sum_i^{N_i} q_{Ji} + \sum_{i-j}^{N_{i-j}} q_{J(i-j)} + \sum_{lp}^{N_{lp}} q_{J(lp)} = 0 \quad (\text{S6})$$

⋮

Eqs. (S4)-(S6) are charge conservation functions of the ABEEM/MM-I model. Eq. (S4) represents that the total charge of the hydroxide ion is constrained to be  $-1.0e$ . Herein,  $q_{\text{O}(\text{OH}^-)}$ ,  $q_{\text{H}(\text{OH}^-)}$ , and  $q_{\text{O-H}(\text{OH}^-)}$  are the charges of O atom, H atom, and O-H bond of  $\text{OH}^-$ . Eq. (S5) represents that the total charge of the water molecule  $I$  is zero. Herein,  $q_{Ii}$ ,  $q_{I(i-j)}$ , and  $q_{I(lp)}$  are the charges of atom  $i$ , bond  $i-j$ , and lone-pair electron  $lp$  in water molecule  $I$ . The remaining equations represent that other water molecules are electric neutral.

## 1.2. The Theoretical Formulas of the ABEEM/MM-II.

$$\chi_{\text{O}(\text{OH}^-)} = \chi_{\text{H}(\text{OH}^-)} = \chi_{\text{O-H}(\text{OH}^-)} = \chi_{Fi} = \chi_{F(i-j)} = \chi_{F(lp)} = \cdots = \bar{\chi}_L \quad (\text{S7})$$

$$\chi_{Ii} = \chi_{I(i-j)} = \chi_{I(lp)} = \cdots = \bar{\chi}_I \quad (\text{S8})$$

$$\chi_{Ji} = \chi_{J(i-j)} = \chi_{J(lp)} = \cdots = \bar{\chi}_J \quad (\text{S9})$$

⋮

Eqs. (S7)-(S9) are the electronegativity equalization equations of the ABEEM/MM-II model. Eq. (S7) is the electronegativity equalization equation of the  $\text{OH}^-$  and its first-shell water molecules, and the remaining equations are those of the external-shell water molecules. Eq. (S7) represents that the electronegativities of each atom, each bond, and each lone-pair electron of the  $\text{OH}^-$  and water molecules in the first hydration shell are equal to the global electronegativity of the first shell including the  $\text{OH}^-$ . Herein,  $\chi_{Fi}$ ,  $\chi_{F(i-j)}$ , and  $\chi_{F(lp)}$  are the electronegativities of atom  $i$ , bond  $i-j$ , and lone-pair electron  $lp$  of the first-shell water molecule  $F$ . Eq. (S8) represents that the electronegativities of each atom, each bond, and each lone-pair electron in the external-shell water molecule  $I$  are

equal to the electronegativity of the water molecule  $I$ . The remaining equations are the electronegativity equalization equations of other external-shell water molecules.

$$q_{\text{O}(\text{OH}^-)} + q_{\text{H}(\text{OH}^-)} + q_{\text{O-H}(\text{OH}^-)} + \sum_F^M \left( \sum_i^{N_i} q_{Fi} + \sum_{i-j}^{N_{i-j}} q_{F(i-j)} + \sum_{lp}^{N_{lp}} q_{F(lp)} \right) = -1 \quad (\text{S10})$$

$$\sum_i^{N_i} q_{Ii} + \sum_{i-j}^{N_{i-j}} q_{I(i-j)} + \sum_{lp}^{N_{lp}} q_{I(lp)} = 0 \quad (\text{S11})$$

$$\sum_i^{N_i} q_{Ji} + \sum_{i-j}^{N_{i-j}} q_{J(i-j)} + \sum_{lp}^{N_{lp}} q_{J(lp)} = 0 \quad (\text{S12})$$

⋮

Eqs. (S10)-(S12) are charge conservation functions of the ABEEM/MM-II model. Eq. (S10) represents that the total charge of the  $\text{OH}^-$  and its first-shell water molecules is constrained to be  $-1.0e$ . Herein,  $q_{Fi}$ ,  $q_{F(i-j)}$ , and  $q_{F(lp)}$  are the charges of atom  $i$ , bond  $i-j$ , and lone-pair electron  $lp$  in first-shell water molecule  $F$ . Eq. (S11) represents that the total charge of the external-shell water molecule  $I$  is zero. The remaining equations represent that other external-shell water molecules are electric neutral.

## 2. Parameters of the ABEEM/MM

Parameters of water molecule in external shells are as same as before<sup>1</sup>. The parameters of the  $\text{OH}^-$  and water molecules in its hydration first shell are listed in the following. The parameters of the ABEEM/MM-I and the ABEEM/MM-II are listed in Table S1 and S2, respectively. The parameters of the optimized correction functions of hydrogen bonds are listed in Table S3.

**Table S1. The ABEEM/MM-I Parameters**

|                                     | $\chi^*$ | $2\eta^*$ | $C$    | $D$    | $r_{\text{OH}}(\text{\AA})$ | $k_{\text{OH}}$ | $\theta$ | $k_{\theta}$ | $\sigma(\text{\AA})$ | $\epsilon(\text{kcal/mol})$ |
|-------------------------------------|----------|-----------|--------|--------|-----------------------------|-----------------|----------|--------------|----------------------|-----------------------------|
| H (OH <sup>-</sup> )                | 5.023    | 60.000    |        |        |                             |                 |          |              | 1.500                | 0.030                       |
| O (OH <sup>-</sup> )                | 1.700    | 0.500     |        |        |                             |                 |          |              | 3.200                | 0.250                       |
| O-H (OH <sup>-</sup> )              | 8.000    | 50.000    |        |        | 0.9670                      | 529.6           |          |              |                      |                             |
| H (firstshell-H <sub>2</sub> O)     | 2.123    | 12.000    | 2.161  |        |                             |                 |          |              | 2.240                | 0.005                       |
| O (firstshell-H <sub>2</sub> O)     | 3.700    | 1.000     | 11.493 | 5.312  |                             |                 |          |              | 3.051                | 0.044                       |
| O-H (firstshell-H <sub>2</sub> O)   | 5.136    | 24.767    | 2.161  | 11.493 | 0.9830                      | 535.6           |          |              |                      |                             |
| H-O-H (firstshell-H <sub>2</sub> O) |          |           |        |        |                             |                 | 104.52   | 34.05        |                      |                             |
| $lp$ (firstshell-H <sub>2</sub> O)  | 3.700    | 0.500     | 1.612  |        |                             |                 |          |              |                      |                             |

**Table S2. The ABEEM/MM-II Parameters**

|                                     | $\chi^*$ | $2\eta^*$ | $C$    | $D$    | $r_{\text{OH}}(\text{\AA})$ | $k_{\text{OH}}$ | $\theta$ | $k_{\theta}$ | $\sigma(\text{\AA})$ | $\epsilon(\text{kcal/mol})$ |
|-------------------------------------|----------|-----------|--------|--------|-----------------------------|-----------------|----------|--------------|----------------------|-----------------------------|
| H (OH <sup>-</sup> )                | 2.023    | 13.220    |        |        |                             |                 |          |              | 1.500                | 0.0200                      |
| O (OH <sup>-</sup> )                | 1.685    | 8.527     |        |        |                             |                 |          |              | 3.420                | 0.2512                      |
| O-H (OH <sup>-</sup> )              | 10.640   | 4.470     |        |        | 0.9730                      | 530.6           |          |              |                      |                             |
| H (firstshell-H <sub>2</sub> O)     | 2.023    | 8.840     | 2.161  |        |                             |                 |          |              | 2.240                | 0.0020                      |
| O (firstshell-H <sub>2</sub> O)     | 3.373    | 0.100     | 11.493 | 5.312  |                             |                 |          |              | 3.051                | 0.0440                      |
| O-H (firstshell-H <sub>2</sub> O)   | 5.136    | 38.500    | 2.161  | 11.493 | 0.9830                      | 533.6           |          |              |                      |                             |
| H-O-H (firstshell-H <sub>2</sub> O) |          |           |        |        |                             |                 | 104.52   | 34.05        |                      |                             |
| $lp$ (firstshell-H <sub>2</sub> O)  | 3.878    | 13.950    | 5.312  |        |                             |                 |          |              |                      |                             |

**Table S3. The Optimized Correction Functions of Hydrogen Bonds**

|                    |                                                        | <i>A</i> | <i>B</i> | <i>U</i> | <i>V</i> |
|--------------------|--------------------------------------------------------|----------|----------|----------|----------|
| <b>ABEEM/MM-I</b>  | $k_{\text{HB}(R_{\text{O}(\text{OH}^-),I(\text{H})})}$ | 1.1700   | 0.1057   | 1.7500   | 0.0430   |
|                    | $k_{\text{HB}(R_{\text{H1},J(lp)})}$                   | 0.6831   | 0.0894   | 1.1510   | 0.0697   |
| <b>ABEEM/MM-II</b> | $k_{\text{HB}(R_{\text{O}(\text{OH}^-),I(\text{H})})}$ | 0.9477   | 0.0797   | 1.8000   | 0.0430   |
|                    | $k_{\text{HB}(R_{\text{H1},J(lp)})}$                   | 0.6210   | 0.0813   | 1.1510   | 0.0697   |

<sup>a</sup>  $k_{\text{HB}(R_{\text{O}(\text{OH}^-),I(\text{H})})}$  is the optimized correction function of the hydrogen bond between the oxygen atom of OH<sup>-</sup> and the hydrogen atom of a first-shell water molecule in the HBIR.

<sup>b</sup>  $k_{\text{HB}(R_{\text{H1},J(lp)})}$  is the optimized correction function of the hydrogen bond between the hydrogen atom of a first-shell water molecule and the lone-pair electron *lp* of an external-shell water molecule in the HBIR.

### 3. The Results of Optimized Structures ( $R_{\text{O-H}}$ , $\bar{R}_{\text{O}\cdots\text{H}}$ , $\bar{\theta}_{\text{H}\cdots\text{O}\cdots\text{H}}$ , and $\bar{\theta}_{\text{O}\cdots\text{H}-\text{O}}$ ) and Binding Energies for the $\text{OH}^-(\text{H}_2\text{O})_n$ ( $n = 1-8$ ) Clusters.

**Table S4. Optimized Structures ( $R_{\text{O-H}}$ ,  $\bar{R}_{\text{O}\cdots\text{H}}$ ,  $\bar{\theta}_{\text{H}\cdots\text{O}\cdots\text{H}}$ , and  $\bar{\theta}_{\text{O}\cdots\text{H}-\text{O}}$ ) of the  $\text{OH}^-(\text{H}_2\text{O})_n$  ( $n = 1-8$ ) Clusters Obtained from the Two ABEEM/MM Models and the *Ab Initio* Calculations**

| Cluster   | $R_{\text{O-H}}^a$ (Å) |            |             | $\bar{R}_{\text{O}\cdots\text{H}}^b$ |            |             | $\bar{\theta}_{\text{H}\cdots\text{O}\cdots\text{H}}^c$ |            |             | $\bar{\theta}_{\text{O}\cdots\text{H}-\text{O}}^d$ (°) |            |             |
|-----------|------------------------|------------|-------------|--------------------------------------|------------|-------------|---------------------------------------------------------|------------|-------------|--------------------------------------------------------|------------|-------------|
|           | MP2/aug-cc-pVDZ        | ABEEM/MM-I | ABEEM/MM-II | MP2/aug-cc-pVDZ                      | ABEEM/MM-I | ABEEM/MM-II | MP2/aug-cc-pVDZ                                         | ABEEM/MM-I | ABEEM/MM-II | MP2/aug-cc-pVDZ                                        | ABEEM/MM-I | ABEEM/MM-II |
| 1 (1+0)   | 0.970                  | 0.965      | 0.968       | 1.483                                | 1.534      | 1.571       |                                                         |            |             | 176.2                                                  | 177.2      | 176.8       |
| 2 (2+0)   | 0.969                  | 0.966      | 0.965       | 1.615                                | 1.629      | 1.646       | 85.4                                                    | 85.0       | 84.5        | 170.4                                                  | 171.1      | 171.2       |
| 3-a (3+0) | 0.966                  | 0.964      | 0.953       | 1.709                                | 1.711      | 1.729       | 84.7                                                    | 84.6       | 83.8        | 160.0                                                  | 160.5      | 161.3       |
| 3-b (2+1) | 0.968                  | 0.963      | 0.963       | 1.549                                | 1.568      | 1.576       | 107.0                                                   | 106.6      | 106.2       | 173.3                                                  | 173.8      | 173.8       |
| 4-a (4+0) | 0.967                  | 0.967      | 0.972       | 1.774                                | 1.771      | 1.858       | 75.1                                                    | 75.1       | 71.2        | 162.5                                                  | 162.8      | 167.4       |
| 4-b (3+1) | 0.966                  | 0.963      | 0.957       | 1.680                                | 1.685      | 1.695       | 85.9                                                    | 85.5       | 85.2        | 161.1                                                  | 161.9      | 162.2       |
| 4-c (3+1) | 0.966                  | 0.964      | 0.961       | 1.670                                | 1.675      | 1.685       | 97.7                                                    | 97.5       | 97.1        | 168.2                                                  | 168.6      | 168.8       |
| 5-a (5+0) | 0.969                  | 0.969      | 0.971       | 1.845                                | 1.782      | 1.843       | 67.2                                                    | 67.9       | 67.2        | 168.6                                                  | 169.3      | 168.7       |
| 5-b (4+1) | 0.968                  | 0.967      | 0.967       | 1.744                                | 1.743      | 1.746       | 79.1                                                    | 79.1       | 79.1        | 167.4                                                  | 167.6      | 167.6       |
| 5-c (4+1) | 0.967                  | 0.967      | 0.967       | 1.730                                | 1.729      | 1.733       | 79.9                                                    | 79.9       | 79.9        | 168.8                                                  | 169.3      | 169.3       |
| 5-d (4+1) | 0.967                  | 0.968      | 0.965       | 1.755                                | 1.753      | 1.758       | 79.6                                                    | 79.6       | 79.5        | 165.6                                                  | 166.0      | 166.0       |
| 5-e (3+2) | 0.968                  | 0.967      | 0.968       | 1.616                                | 1.626      | 1.627       | 110.5                                                   | 110.4      | 110.4       | 175.4                                                  | 175.7      | 175.6       |
| 6-a (5+1) | 0.969                  | 0.970      | 0.970       | 1.859                                | 1.854      | 1.856       | 71.6                                                    | 71.6       | 71.7        | 164.4                                                  | 164.6      | 164.4       |
| 6-b (3+3) | 0.966                  | 0.963      | 0.960       | 1.659                                | 1.666      | 1.674       | 98.2                                                    | 98.0       | 97.7        | 164.9                                                  | 165.1      | 165.4       |
| 6-c (3+3) | 0.967                  | 0.966      | 0.963       | 1.635                                | 1.642      | 1.647       | 100.3                                                   | 100.0      | 99.9        | 169.9                                                  | 171.0      | 170.5       |
| 6-d (3+3) | 0.968                  | 0.968      | 0.966       | 1.585                                | 1.594      | 1.596       | 108.8                                                   | 108.7      | 108.7       | 178.3                                                  | 179.2      | 179.0       |
| 7-a (4+3) | 0.968                  | 0.968      | 0.966       | 1.741                                | 1.740      | 1.744       | 80.9                                                    | 80.9       | 80.8        | 168.2                                                  | 168.7      | 168.6       |
| 7-b (3+4) | 0.967                  | 0.966      | 0.964       | 1.637                                | 1.643      | 1.647       | 99.4                                                    | 99.2       | 99.1        | 169.1                                                  | 170.0      | 169.6       |
| 7-c (4+3) | 0.968                  | 0.968      | 0.965       | 1.741                                | 1.740      | 1.746       | 82.5                                                    | 82.4       | 82.3        | 166.1                                                  | 166.3      | 166.5       |
| 8-a (3+5) | 0.967                  | 0.964      | 0.962       | 1.612                                | 1.628      | 1.628       | 100.4                                                   | 100.0      | 100.0       | 170.1                                                  | 170.7      | 170.4       |
| 8-b (4+4) | 0.968                  | 0.967      | 0.966       | 1.736                                | 1.736      | 1.739       | 86.3                                                    | 86.3       | 86.2        | 170.1                                                  | 169.9      | 169.9       |

| MAD <sup>e</sup>                                                                                                                                                                                                                                                                                                                                                                                                                                                                                                                                                                                                                                                                                                                                 | 0.002 | 0.004 | 0.011 | 0.018 | 0.2 | 0.5 | 0.5 | 0.7 |
|--------------------------------------------------------------------------------------------------------------------------------------------------------------------------------------------------------------------------------------------------------------------------------------------------------------------------------------------------------------------------------------------------------------------------------------------------------------------------------------------------------------------------------------------------------------------------------------------------------------------------------------------------------------------------------------------------------------------------------------------------|-------|-------|-------|-------|-----|-----|-----|-----|
| <sup>a</sup> $R_{\text{O-H}}$ is the bond length of OH <sup>-</sup> . <sup>b</sup> $\overline{R}_{\text{O}\cdots\text{H}}$ is the average hydrogen bond length formed by the oxygen atom of OH <sup>-</sup> and the hydrogen atom of a first-shell water molecules. <sup>c</sup> $\overline{\theta}_{\text{H}\cdots\text{O}\cdots\text{H}}$ is the average angle between two neighboring hydrogen bonds in the first shell. <sup>d</sup> $\overline{\theta}_{\text{O}\cdots\text{H-O}}$ is the average hydrogen bond angle formed by the O atom of OH <sup>-</sup> and the H-O bond of a first-shell water molecule. <sup>e</sup> MAD is the mean absolute deviation of the results of the ABEEM/MM models compared to those of MP2/aug-cc-pVDZ. |       |       |       |       |     |     |     |     |

**Table S5. Optimized Structures ( $R_{\text{O-H}}$ ,  $\bar{R}_{\text{O}\cdots\text{H}}$ ,  $\bar{\theta}_{\text{H}\cdots\text{O}\cdots\text{H}}$ , and  $\bar{\theta}_{\text{O}\cdots\text{H-O}}$ ) of the  $\text{OH}^-(\text{H}_2\text{O})_n$  ( $n = 1-8$ ) Clusters Obtained from the OPLS/AA-FF, the OPLS-SMOOTH/AA-FF, and the *Ab Initio* Calculations**

| Cluster          | $R_{\text{O-H}}^a$ (Å) |            |                   | $\bar{R}_{\text{O}\cdots\text{H}}^b$ |            |                   | $\bar{\theta}_{\text{H}\cdots\text{O}\cdots\text{H}}^c$ |            |                   | $\bar{\theta}_{\text{O}\cdots\text{H-O}}^d$ |            |                   |
|------------------|------------------------|------------|-------------------|--------------------------------------|------------|-------------------|---------------------------------------------------------|------------|-------------------|---------------------------------------------|------------|-------------------|
|                  | MP2/aug-cc-pVDZ        | OPLS/AA-FF | OPLS-SMOOTH/AA-FF | MP2/aug-cc-pVDZ                      | OPLS/AA-FF | OPLS-SMOOTH/AA-FF | MP2/aug-cc-pVDZ                                         | OPLS/AA-FF | OPLS-SMOOTH/AA-FF | MP2/aug-cc-pVDZ                             | OPLS/AA-FF | OPLS-SMOOTH/AA-FF |
| 1 (1+0)          | 0.970                  | 0.947      | 0.948             | 1.483                                | 1.609      | 1.554             |                                                         |            |                   | 176.2                                       | 165.1      | 166.0             |
| 2 (2+0)          | 0.969                  | 0.950      | 0.950             | 1.615                                | 1.639      | 1.595             | 85.4                                                    | 75.6       | 77.7              | 170.4                                       | 164.4      | 165.2             |
| 3-a (3+0)        | 0.966                  | 0.952      | 0.953             | 1.709                                | 1.667      | 1.630             | 84.7                                                    | 78.2       | 79.9              | 160.0                                       | 162.1      | 163.1             |
| 3-b (2+1)        | 0.968                  | 0.951      | 0.951             | 1.549                                | 1.589      | 1.533             | 107.0                                                   | 95.0       | 99.3              | 173.3                                       | 169.4      | 169.9             |
| 4-a (4+0)        | 0.967                  | 0.955      | 0.956             | 1.774                                | 1.682      | 1.654             | 75.1                                                    | 72.4       | 73.6              | 162.5                                       | 163.9      | 164.9             |
| 4-b (3+1)        | 0.966                  |            |                   | 1.680                                |            |                   | 85.9                                                    |            |                   | 161.1                                       |            |                   |
| 4-c (3+1)        | 0.966                  | 0.954      | 0.954             | 1.670                                | 1.627      | 1.586             | 97.7                                                    | 90.9       | 92.4              | 168.2                                       | 167.2      | 167.7             |
| 5-a (5+0)        | 0.969                  | 0.958      | 0.959             | 1.845                                | 1.698      | 1.685             | 67.2                                                    | 67.0       | 67.7              | 168.6                                       | 168.2      | 168.8             |
| 5-b (4+1)        | 0.968                  | 0.956      | 0.956             | 1.744                                | 1.659      | 1.629             | 79.1                                                    | 75.9       | 77.2              | 167.4                                       | 168.0      | 168.6             |
| 5-c (4+1)        | 0.967                  | 0.956      | 0.957             | 1.730                                | 1.656      | 1.625             | 79.9                                                    | 76.2       | 77.5              | 168.8                                       | 168.0      | 168.6             |
| 5-d (4+1)        | 0.967                  | 0.956      | 0.957             | 1.755                                | 1.659      | 1.628             | 79.6                                                    | 79.9       | 81.1              | 165.6                                       | 167.2      | 167.9             |
| 5-e (3+2)        | 0.968                  | 0.956      | 0.956             | 1.616                                | 1.593      | 1.543             | 110.5                                                   | 104.0      | 105.5             | 175.4                                       | 173.6      | 174.0             |
| 6-a (5+1)        | 0.969                  | 0.959      | 0.959             | 1.859                                | 1.693      | 1.673             | 71.6                                                    | 75.1       | 76.1              | 164.4                                       | 166.2      | 166.8             |
| 6-b (3+3)        | 0.966                  | 0.955      | 0.956             | 1.659                                | 1.595      | 1.545             | 98.2                                                    | 94.1       | 95.9              | 164.9                                       | 172.5      | 172.8             |
| 6-c (3+3)        | 0.967                  |            |                   | 1.635                                |            |                   | 100.3                                                   |            |                   | 169.9                                       |            |                   |
| 6-d (3+3)        | 0.968                  |            |                   | 1.585                                |            |                   | 108.8                                                   |            |                   | 178.3                                       |            |                   |
| 7-a (4+3)        | 0.968                  |            |                   | 1.741                                |            |                   | 80.9                                                    |            |                   | 168.2                                       |            |                   |
| 7-b (3+4)        | 0.967                  | 0.955      | 0.955             | 1.637                                | 1.608      | 1.562             | 99.4                                                    | 100.7      | 102.2             | 169.1                                       | 169.9      | 170.6             |
| 7-c (4+3)        | 0.968                  | 0.957      | 0.958             | 1.741                                | 1.640      | 1.606             | 82.5                                                    | 82.6       | 83.5              | 166.1                                       | 169.4      | 170.2             |
| 8-a (3+5)        | 0.967                  |            |                   | 1.612                                |            |                   | 100.4                                                   |            |                   | 170.1                                       |            |                   |
| 8-b (4+4)        | 0.968                  | 0.959      | 0.960             | 1.736                                | 1.622      | 1.586             | 86.3                                                    | 89.3       | 90.4              | 170.1                                       | 175.1      | 175.3             |
| MAD <sup>e</sup> |                        | 0.013      | 0.012             |                                      | 0.346      | 0.102             |                                                         | 4.2        | 3.5               |                                             | 3.1        | 3.2               |

<sup>a</sup>  $R_{\text{O-H}}$  is the bond length of  $\text{OH}^-$ . <sup>b</sup>  $\bar{R}_{\text{O}\cdots\text{H}}$  is the average hydrogen bond length formed by the oxygen atom of  $\text{OH}^-$  and the hydrogen atom of a first-shell water molecules. <sup>c</sup>  $\bar{\theta}_{\text{H}\cdots\text{O}\cdots\text{H}}$  is the average angle between two neighboring hydrogen bonds in the first shell. <sup>d</sup>  $\bar{\theta}_{\text{O}\cdots\text{H-O}}$  is the average hydrogen bond angle formed by the O atom of  $\text{OH}^-$  and the H-O bond of a first-shell water molecule. <sup>e</sup> MAD is the mean absolute deviation of the results of the OPLS/AA-FF and OPLS-SMOOTH/AA-FF compared to those of MP2/aug-cc-pVDZ.

**Table S6. Binding Energies (in kcal/mol) of OH·(H<sub>2</sub>O)<sub>n</sub> (*n* = 1-8) Obtained from the Two ABEEM/MM Models, the OPLS/AA-FF, the OPLS-SMOOTH/AA-FF, and the *Ab Initio* Calculations**

| Cluster           | ABEEM/MM-I | ABEEM/MM-II | OPLS/AA-FF | OPLS-SMOOTH/AA-FF | MP2/aug-cc-pVDZ <sup>a</sup> |
|-------------------|------------|-------------|------------|-------------------|------------------------------|
| 1 (1+0)           | -22.88     | -24.49      | -24.36     | -24.42            | -23.46                       |
| 2 (2+0)           | -41.99     | -36.29      | -47.43     | -47.29            | -41.47                       |
| 3- <i>a</i> (3+0) | -58.59     | -56.16      | -69.61     | -69.16            | -57.09                       |
| 3- <i>b</i> (2+1) | -54.35     | -56.59      | -63.75     | -63.68            | -56.32                       |
| 4- <i>a</i> (4+0) | -74.49     | -69.39      | -89.77     | -88.93            | -71.01                       |
| 4- <i>b</i> (3+1) | -68.42     | -75.42      |            |                   | -68.64                       |
| 4- <i>c</i> (3+1) | -68.34     | -72.76      | -85.19     | -84.77            | -69.60                       |
| 5- <i>a</i> (5+0) | -87.67     | -78.59      | -106.38    | -105.05           | -80.71                       |
| 5- <i>b</i> (4+1) | -85.43     | -81.75      | -103.55    | -102.65           | -82.50                       |
| 5- <i>c</i> (4+1) | -83.82     | -81.90      | -103.08    | -102.21           | -82.53                       |
| 5- <i>d</i> (4+1) | -84.13     | -82.89      | -104.12    | -103.24           | -83.51                       |
| 5- <i>e</i> (3+2) | -80.45     | -79.72      | -97.46     | -97.11            | -82.35                       |
| 6- <i>a</i> (5+1) | -98.56     | -95.87      | -122.00    | -120.55           | -93.95                       |
| 6- <i>b</i> (3+3) | -97.18     | -87.23      | -113.04    | -112.42           | -92.71                       |
| 6- <i>c</i> (3+3) | -87.19     | -97.05      |            |                   | -94.02                       |
| 6- <i>d</i> (3+3) | -84.53     | -83.21      |            |                   | -91.88                       |
| 7- <i>a</i> (4+3) | -102.39    | -116.63     |            |                   | -105.07                      |
| 7- <i>b</i> (3+4) | -100.44    | -111.47     | -120.85    | -119.73           | -105.78                      |
| 7- <i>c</i> (4+3) | -106.00    | -92.39      | -126.71    | -125.58           | -103.62                      |
| 8- <i>a</i> (3+5) | -121.77    | -122.91     |            |                   | -113.56                      |
| 8- <i>b</i> (4+4) | -126.76    | -123.54     | -142.85    | -141.44           | -115.63                      |
| MRE <sup>b</sup>  | 4.07%      | 5.09%       | 21.20%     | 20.35%            |                              |

<sup>a</sup>Binding energies were calculated with CP and ZPE corrections.

<sup>b</sup>MRE is the mean relative error of the results of the ABEEM/MM models, the OPLS/AA-FF, and the OPLS-SMOOTH/AA-FF compared to those of MP2/aug-cc-pVDZ.

#### 4. The Results of Optimized Structures ( $R_{\text{O-H}}$ , $\bar{R}_{\text{O}\cdots\text{H}}$ , $\bar{\theta}_{\text{H}\cdots\text{O}\cdots\text{H}}$ , and $\bar{\theta}_{\text{O}\cdots\text{H-O}}$ ) and Binding Energies for the Larger Clusters.

**Table S7. Optimized Structures ( $R_{\text{O-H}}$ ,  $\bar{R}_{\text{O}\cdots\text{H}}$ ,  $\bar{\theta}_{\text{H}\cdots\text{O}\cdots\text{H}}$ , and  $\bar{\theta}_{\text{O}\cdots\text{H-O}}$ ) of the Larger Clusters Obtained from the ABEEM/MM-I Model and the QM Calculations**

| Cluster          | $R_{\text{O-H}}^a$ (Å) |            | $\bar{R}_{\text{O}\cdots\text{H}}^b$ (Å) |            | $\bar{\theta}_{\text{H}\cdots\text{O}\cdots\text{H}}^c$ (°) |            | $\bar{\theta}_{\text{O}\cdots\text{H-O}}^d$ (°) |            |
|------------------|------------------------|------------|------------------------------------------|------------|-------------------------------------------------------------|------------|-------------------------------------------------|------------|
|                  | QM                     | ABEEM/MM-I | QM                                       | ABEEM/MM-I | QM                                                          | ABEEM/MM-I | QM                                              | ABEEM/MM-I |
| 10(4+6)          | 0.969                  | 0.970      | 1.738                                    | 1.736      | 83.2                                                        | 83.2       | 170.0                                           | 170.0      |
| 15(3+12)         | 0.964                  | 0.961      | 1.573                                    | 1.586      | 100.5                                                       | 100.0      | 167.3                                           | 168.4      |
| 23(3+20)         | 0.965                  | 0.963      | 1.549                                    | 1.559      | 107.0                                                       | 106.9      | 173.4                                           | 173.4      |
| MAD <sup>f</sup> |                        | 0.002      |                                          | 0.008      |                                                             | 0.2°       |                                                 | 0.4°       |

<sup>a</sup>  $R_{\text{O-H}}$  is the bond length of OH<sup>-</sup>. <sup>b</sup>  $\bar{R}_{\text{O}\cdots\text{H}}$  is the average hydrogen bond length formed by the oxygen atom of OH<sup>-</sup> and the hydrogen atom of a first-shell water molecules. <sup>c</sup>  $\bar{\theta}_{\text{H}\cdots\text{O}\cdots\text{H}}$  is the average angle between two neighboring hydrogen bonds in the first shell. <sup>d</sup>  $\bar{\theta}_{\text{O}\cdots\text{H-O}}$  is the average hydrogen bond angle formed by the O atom of OH<sup>-</sup> and the H-O bond of a first-shell water molecule. <sup>e</sup> The QM results of OH<sup>-</sup>(H<sub>2</sub>O)<sub>10</sub> are from MP2/aug-cc-pVDZ calculation and the results of OH<sup>-</sup>(H<sub>2</sub>O)<sub>*n*</sub> (*n* = 15, 23) are from B3LYP/6-31++G(d,p) calculations. <sup>f</sup> MAD is the mean absolute deviation of the results of the ABEEM/MM-I model compared to those of QM results.

**Table S8. Binding Energies (in kcal/mol) of OH<sup>-</sup>(H<sub>2</sub>O)<sub>n</sub> (*n* = 10, 15, 23) from the ABEEM/MM-I Model, the OPLS/AA-FF, the OPLS-SMOOTH/AA-FF, and the QM Calculations**

| Cluster          | ABEEM/MM-I | OPLS/AA-FF | OPLS-SMOOTH/AA-FF | QM <sup>a</sup> |
|------------------|------------|------------|-------------------|-----------------|
| 10(4+6)          | -127.5     | -161.8     | -159.7            | -137.6          |
| 15(3+12)         | -180.3     |            |                   | -188.9          |
| 23(3+20)         | -293.7     |            |                   | -270.9          |
| MRE <sup>b</sup> | 6.67%      |            |                   |                 |

<sup>a</sup>Binding energies were calculated with CP and ZPE corrections.

<sup>b</sup>MRE is the mean relative error of the results of the ABEEM/MM-I model compared to those of QM results.

## REFERENCES

1. Yang, Z.-Z.; Wu, Y.; Zhao, D.-X. Atom-Bond Electronegativity Equalization Method Fused into Molecular Mechanics. I. A Seven-Site Fluctuating Charge and Flexible Body Water Potential Function for Water Clusters. *J. Chem. Phys.* **2004**, *120*, 2541-2557
